# Supplementary material for: How to Perform and Interpret Functional Magnetic Resonance Imaging Studies in Functional Gastrointestinal Disorders
Source: PubMed Central journal article supplement — J Neurogastroenterol Motil. 2017 Apr 1;23(2):197–207. doi: 10.5056/jnm16196 (PMC5383114; doi:10.5056/jnm16196), 2017-04-01
Supplement: jnm-23-197_suppl.pdf [file jnm-23-197_suppl.pdf]

**Supplementary Table.** Glossary for Functional Magnetic Resonance Imaging and Definition of the Sequence Parameters for Echo Planar Imaging

| Parameter                    |                 | Definition                                                                                                                                                                                                                                       | Typical value        |
|------------------------------|-----------------|--------------------------------------------------------------------------------------------------------------------------------------------------------------------------------------------------------------------------------------------------|----------------------|
| Blood oxygen level dependent |                 | A change in T2* MRI signal caused by differences in the amount of oxygenated hemoglobin in the vessels near neurons. Oxygenated hemoglobin has a smaller magnetic susceptibility than deoxygenated hemoglobin which generates higher T2* signal. |                      |
| Cerebral blood volume        |                 | The volume of blood in the blood vessel                                                                                                                                                                                                          |                      |
| Contrast                     |                 | The difference in signal intensity between two tissues in an image.                                                                                                                                                                              |                      |
| Gradient coils               |                 | Coils of wire used to generate the magnetic field gradients.                                                                                                                                                                                     |                      |
| Hemodynamic response         |                 | The changes in blood flow, blood volume and blood oxygenation in response to local neural activity.                                                                                                                                              |                      |
| MRI                          |                 | Use of magnetic resonance to create images of objects by imaging the distribution of hydrogen nuclei (protons).                                                                                                                                  |                      |
| Pulse Sequence               |                 | Sequence of pulse signals sent to the RF transmit/receive coil, to the slice-selection gradient coil, to the frequency-encoding coil, and to the phase-encoding coil during an MRI experiment.                                                   |                      |
| RF                           |                 | Wave frequency intermediate between auditory and infrared.                                                                                                                                                                                       |                      |
| RF coils                     |                 | The coils used to transmit the RF electromagnetic energy that flips the magnetization, and to receive the nuclear magnetic resonance signal generated by the precession of the resulting transverse magnetization.                               |                      |
| Scan                         |                 | A single, continuous collection of images.                                                                                                                                                                                                       |                      |
| Tesla                        |                 | A unit of magnetic field strength.                                                                                                                                                                                                               |                      |
| T1-weighted MRI              |                 | A magnetic resonance image generated using imaging parameters that cause contrast to be primarily based on differences in T1 times for different tissues (used for anatomy image).                                                               | Short TR/TE          |
| T2-weighted MRI              |                 | A magnetic resonance image generated using imaging parameters that cause contrast to be primarily based on differences in T2 times for different tissues (used for discrimination of pathological changes).                                      | Long TR/TE           |
| T2*                          |                 | A spin-spin relaxation time composed of contributions from molecular interactions and inhomogeneous magnetic field (used for functional image).                                                                                                  |                      |
| Voxel                        |                 | A single unit in a 3-dimensional volume.                                                                                                                                                                                                         |                      |
| <hr/>                        |                 |                                                                                                                                                                                                                                                  |                      |
| EPI                          |                 | An MRI technique for collecting a 2-dimensional planar image from single excitation.                                                                                                                                                             |                      |
| Timing parameter             | TE              | Time between the RF pulse (from coil to tissue) and echo signal (from tissue to coil).                                                                                                                                                           | 30-60 msec           |
|                              | TR              | Time between repeating series of RF pulses.                                                                                                                                                                                                      | 1000-3000 msec       |
| Flip angle                   |                 | The amount of rotated or tipped net magnetization during RF pulse application.                                                                                                                                                                   | 60-90°               |
| Resolution parameter         | FOV             | Spatial region of MRI data collected (x, y size of image matrix).                                                                                                                                                                                | Various              |
|                              | Matrix size     | Number of voxel in slice (number of voxels on x and y axis of FOV).                                                                                                                                                                              | 64 × 64 or 128 × 128 |
|                              | Slice thickness | The thickness of a slice (z size of voxel).                                                                                                                                                                                                      | 2-3 mm               |
| Bandwidth                    |                 | Range of frequencies of signal sampling or slice selection.                                                                                                                                                                                      | Various              |

MRI, magnetic resonance imaging; RF, radiofrequency; TR, time to repetition; TE, time to echo; EPI, echo planar imaging; FOV, field of view.
